# Supplementary material for: The Effect of Landscape Environmental Factors on Gene Flow of Red Deer (Cervus canadensis xanthopygus) in the Southern of the Greater Khingan Mountains, China
Source: MDPI journal article supplement (doi:10.3390/biology12040576), 2023-04-10
Supplement: s1 [file s1]

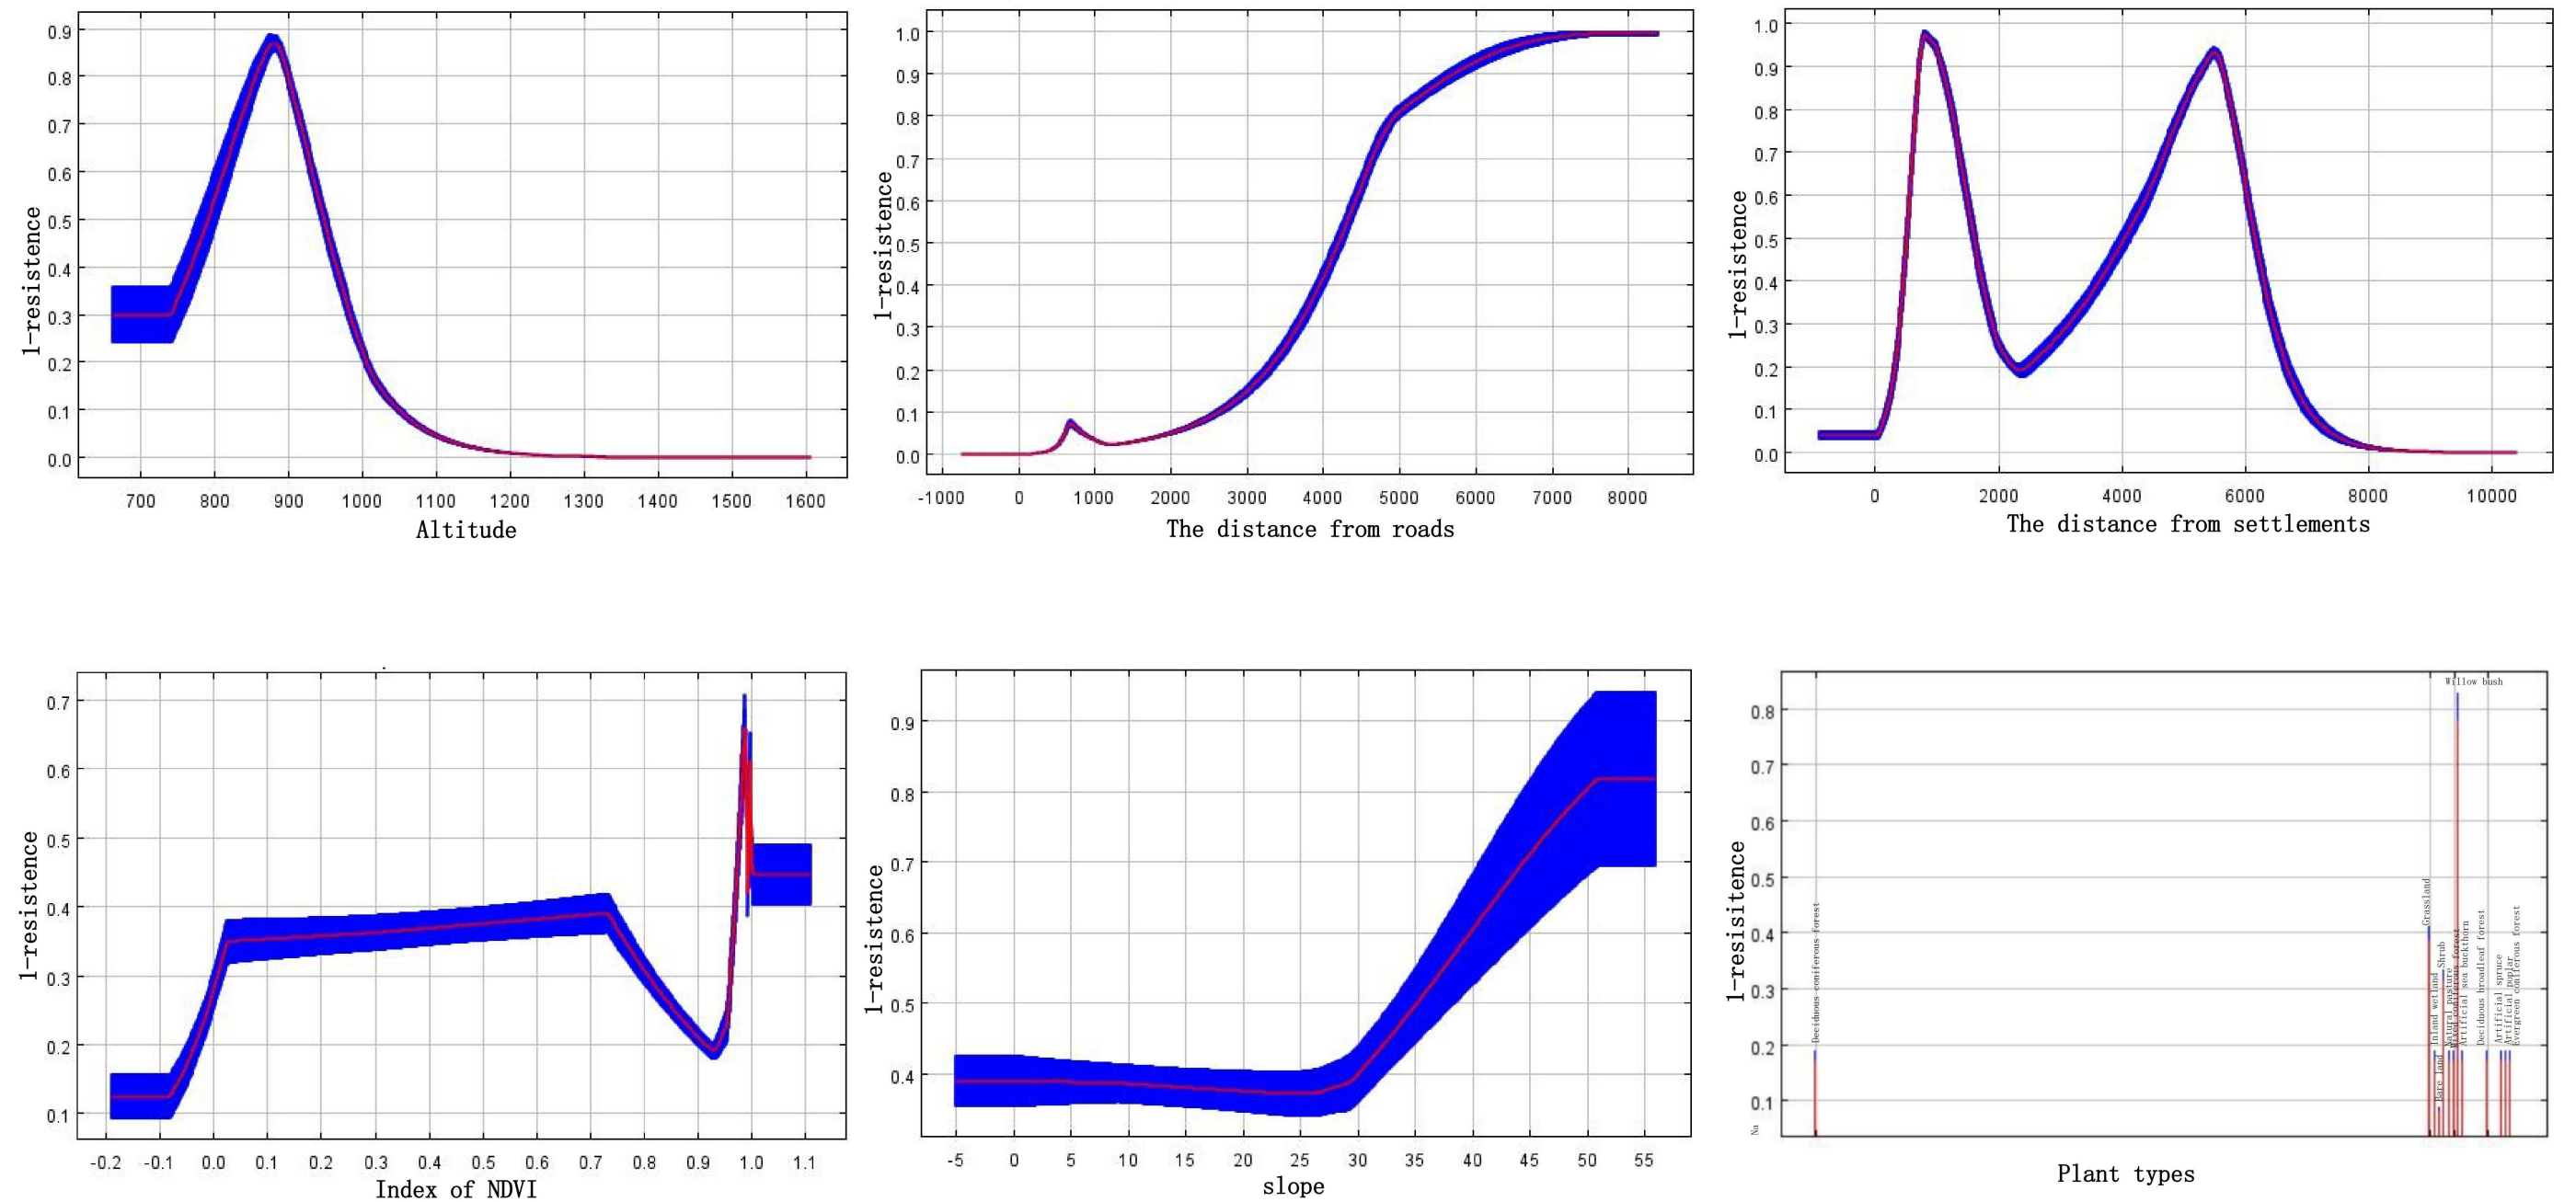

Figure S1: The relationship between dispersal resistance of red deer groups and environmental variables.
