# Supplementary material for: The Effect of Landscape Environmental Factors on Gene Flow of Red Deer (Cervus canadensis xanthopygus) in the Southern of the Greater Khingan Mountains, China
Source: MDPI journal article supplement (doi:10.3390/biology12040576), 2023-04-10
Supplement: s1 [file s1]

**Table S1.** PCR amplification system of red deer for mtDNA and microsatellite

| Reagent                                | Volume (μl)  |                |
|----------------------------------------|--------------|----------------|
|                                        | Cyt <i>b</i> | Microsatellite |
| 2×Rapid Taq Master Mix (China, Vazyme) | 10.0         | 10.0           |
| Forward Primer (10 μMol /L)            | 0.8          | 0.8            |
| Reverse Primer (10 μMol /L)            | 0.8          | 0.8            |
| DNA (25-50 ng/μL)                      | 2.0          | 6.0            |
| ddH <sub>2</sub> O                     | 6.4          | 2.4            |
| Total                                  | 20.0         | 20.0           |
