# Supplementary material for: The Effect of Landscape Environmental Factors on Gene Flow of Red Deer (Cervus canadensis xanthopygus) in the Southern of the Greater Khingan Mountains, China
Source: MDPI journal article supplement (doi:10.3390/biology12040576), 2023-04-10
Supplement: s1 [file s1]

**Table S2.** Details of 8 microsatellite loci used for the study

| Locus               | Primer sequence (5'-3')                                | Allele Length (bp) | Repeat type | Annealing temperature (°C) |
|---------------------|--------------------------------------------------------|--------------------|-------------|----------------------------|
| ETH225 <sup>1</sup> | F: gatcaccttgccactatttct<br>R: acatgacagccagctgctact   | 133-185            | 2           | 56.0                       |
| T501 <sup>2</sup>   | F: ctctctcattattaccctgtgaa<br>R: acatgctttgaccaagacc   | 238-262            | 4           | 55.0                       |
| T156 <sup>3</sup>   | F: tcttctgacctgtgtcttg<br>R: gatgaataccagctctgtctg     | 135-207            | 4           | 56.4                       |
| BM848 <sup>4</sup>  | F: tgggttgaaggaaaacttg<br>R: cctctgctcctaagacac        | 350-366            | 2           | 54.5                       |
| T530 <sup>4</sup>   | F: gtctcacagcagctctatg<br>R: gcattctttagaactccaactg    | 244-292            | 4           | 55.0                       |
| DM45 <sup>3</sup>   | F: caccgtttcttacaatctca<br>R: aggggtcaggttctcagtttctac | 440-460            | 2           | 55.5                       |
| N <sup>2</sup>      | F: tccagagaagcaaccaatag<br>R: gtgtgccttaacaacctgt      | 282-290            | 4           | 56.0                       |
| T507 <sup>3</sup>   | F: aggcagatgcttcaccatc<br>R: tgtggagcacctcacacat       | 144-176            | 4           | 56.6                       |

<sup>1</sup>Tamra, <sup>2</sup>Rox, <sup>3</sup>Fam, <sup>4</sup>Hex
